# Supplementary material for: A highly negatively charged γ-Keggin germanodecatungstate efficient for Knoevenagel condensation
Source: Royal Society of Chemistry journal article supplement (doi:10.1039/c2cc33839d), 2012-01-01
Supplement: c2cc33839d.pdf [file c2cc33839d.pdf]

*Electronic Supplementary Information (ESI) for*

## **A highly negatively charged $\gamma$ -Keggin germanodecatungstate efficient for Knoevenagel condensation**

Kosei Sugahara,<sup>a</sup> Toshihiro Kimura,<sup>a</sup> Keigo Kamata,<sup>a</sup> Kazuya Yamaguchi,<sup>a</sup> and Noritaka Mizuno\*<sup>a</sup>

<sup>a</sup>Department of Applied Chemistry, School of Engineering, The University of Tokyo, 7-3-1 Hongo, Bunkyo-ku, Tokyo 113-8656, Japan.

### **Experimental Section**

**Materials.** Acetonitrile (Kanto Chemical) was purified by The Ultimate Solvent System (GlassContour Company) prior to use.<sup>S1</sup> Substrates and other solvents were purified according to reported procedures.<sup>S2</sup> Na<sub>2</sub>WO<sub>4</sub>·2H<sub>2</sub>O (Nippon Inorganic Colour & Chemical), GeO<sub>2</sub> (Wako Chemical), tetra-*n*-butylammonium bromide (TBABr) (TCI), tetra-*n*-butylammonium hydroxide 30-hydrate (TBAOH·30H<sub>2</sub>O) (Aldrich), tetramethylammonium chloride (TCI), and deuterated solvents (CDCl<sub>3</sub> and dimethyl sulfoxide (DMSO)-*d*<sub>6</sub>) (ACROS) were used as received. Divacant polyoxodecatungstates, TBA<sub>4</sub>[ $\gamma$ -SiW<sub>10</sub>O<sub>34</sub>(H<sub>2</sub>O)<sub>2</sub>]<sup>S3a</sup> and K<sub>8</sub>[ $\gamma$ -GeW<sub>10</sub>O<sub>36</sub>]<sub>6</sub>H<sub>2</sub>O,<sup>S3b</sup> were synthesized according to literature procedures.

**Instruments.** IR spectra were measured on a JASCO FTIR-460 spectrometer using KBr disks. NMR spectra were recorded on a JEOL JNM-EX-270 spectrometer (<sup>1</sup>H, 270.0 MHz; <sup>13</sup>C, 67.80 MHz; <sup>29</sup>Si, 53.45 MHz; <sup>183</sup>W, 11.20 MHz) by using 5 mm (for <sup>1</sup>H and <sup>13</sup>C) or 10 mm (for <sup>29</sup>Si and <sup>183</sup>W) tubes. Chemical shifts ( $\delta$ ) were reported in ppm downfield from SiMe<sub>4</sub> (solvent, CDCl<sub>3</sub>) for <sup>1</sup>H, <sup>13</sup>C, and <sup>29</sup>Si NMR spectra and from 2 M Na<sub>2</sub>WO<sub>4</sub> (solvent, D<sub>2</sub>O) for <sup>183</sup>W NMR spectra. GC analyses were performed on Shimadzu GC-2014 with a flame ionization detector equipped with a TC-WAX capillary column (internal diameter = 0.25 mm, length = 30 m) or an InertCap 5 capillary column (internal diameter = 0.25 mm, length = 30 m). Mass spectra were recorded on Shimadzu GCMS-QP2010 equipped with a TC-5HT capillary column at an ionization voltage of 70 eV. Cold-spray ionization mass spectra were measured on a JEOL JMS-T100CS spectrometer in the negative ion mode by direct infusion with a syringe pump (0.05 mL min<sup>-1</sup>).

**X-ray Crystallography.** X-ray diffraction measurements were made on a Rigaku AFC-10 Saturn 724 CCD detector with graphite monochromated Mo K $\alpha$  radiation ( $\lambda = 0.71069$  Å). The data of TBA<sub>6</sub>·I were collected using CrystalClear<sup>S4</sup> at 153 K, and indexing, integration, and absorption correction were performed with HKL2000<sup>S5</sup> software for Linux. Neutral scattering factors were obtained from the standard source. In the data reduction, corrections for Lorentz and polarization effects were made. The structural analysis was performed using CrystalStructure<sup>S6</sup> and Win-GX for Windows software.<sup>S7</sup> The

molecular structures of  $[(\text{CH}_3)_4\text{N}]_4[\gamma\text{-GeW}_{10}\text{O}_{34}(\text{H}_2\text{O})_2]$  and  $\text{TBA}_6\cdot\mathbf{I}$  were solved by combination of SHELXS-97 (direct methods) and SHELXH-97 (Fourier and least squares refinement).<sup>S8</sup> Tungsten, silicon, and oxygen atoms were refined anisotropically, and carbon and nitrogen atoms were refined isotropically. There are class A alerts (PLAT306\_ALERT\_2\_A) in our CIF of  $[(\text{CH}_3)_4\text{N}]_4[\gamma\text{-GeW}_{10}\text{O}_{34}(\text{H}_2\text{O})_2]\cdot 8\text{H}_2\text{O}$  because the hydrogen atoms of water molecules were not included in the refinement.

**Synthesis and Characterization of  $[(n\text{-C}_4\text{H}_9)_4\text{N}]_4[\gamma\text{-GeW}_{10}\text{O}_{34}(\text{H}_2\text{O})_2]$ .** Into water (60 mL),  $\text{K}_8[\gamma\text{-GeW}_{10}\text{O}_{36}]\cdot 6\text{H}_2\text{O}$  (6 g, 2 mmol) was dissolved and the pH value of the aqueous solution was carefully adjusted to 2.0 with  $\text{HNO}_3$ . After stirring the solution for 3 min at room temperature, an excess amount of TBABr (6.5 g, 20 mmol) was added in a single step. The resulting white precipitate of  $\text{TBA}_4[\gamma\text{-GeW}_{10}\text{O}_{34}(\text{H}_2\text{O})_2]$  was collected by filtration, washed with an excess amount of  $\text{H}_2\text{O}$ , and evacuated at ambient temperature. The analytically pure  $\text{TBA}_4[\gamma\text{-GeW}_{10}\text{O}_{34}(\text{H}_2\text{O})_2]$  was obtained as a white powder. Yield 2.8 g (39 %).  $^{183}\text{W}$  NMR (11.20 MHz,  $\text{DMSO-}d_6$ , 298 K,  $\text{Na}_2\text{WO}_4$ )  $\delta = -72.1$  ( $\Delta\nu_{1/2} = 4.1$  Hz),  $-76.1$  ( $\Delta\nu_{1/2} = 4.1$  Hz),  $-83.9$  ( $\Delta\nu_{1/2} = 5.6$  Hz),  $-99.6$  ( $\Delta\nu_{1/2} = 6.1$  Hz), and  $-183.7$  ppm ( $\Delta\nu_{1/2} = 5.2$  Hz) with an integrated intensity ratio of 1:1:1:1:1, respectively; UV-Vis ( $\text{CH}_3\text{CN}$ )  $\lambda_{\text{max}}$  ( $\epsilon$ ) 259 nm ( $26200 \text{ mol}^{-1}\text{dm}^3\text{cm}^{-1}$ ); IR (KBr), 957, 883, 859, 819, 752, 688, 543, 495, 464, 437, 356  $\text{cm}^{-1}$ ; positive ion MS (CSI,  $\text{DMSO}$ ),  $m/z$  2033 ( $[\text{TBA}_6\text{GeW}_{10}\text{O}_{34}(\text{DMSO})_2]^{2+}$ ) and 3824 ( $[\text{TBA}_5\text{GeW}_{10}\text{O}_{34}(\text{DMSO})_2]^+$ ); elemental analysis calcd (%) for  $\text{C}_{64}\text{H}_{148}\text{N}_4\text{O}_{36}\text{GeW}_{10}$  ( $[(n\text{-C}_4\text{H}_9)_4\text{N}]_4[\gamma\text{-GeW}_{10}\text{O}_{34}(\text{H}_2\text{O})_2]$ ), C 22.21, H 4.31, N 1.62, Ge 2.10, W 53.12; found, C 22.26, H 4.45, N 1.67, Ge 2.01, W 53.00.

**Synthesis and Characterization of  $[(n\text{-C}_4\text{H}_9)_4\text{N}]_6[\gamma\text{-H}_2\text{GeW}_{10}\text{O}_{36}]$  (**I**).** Into the acetonitrile solution (2 mL) containing  $\text{TBA}_4[\gamma\text{-GeW}_{10}\text{O}_{34}(\text{H}_2\text{O})_2]$  (0.37 g, 0.10 mmol),  $\text{TBAOH}\cdot 30\text{H}_2\text{O}$  (162 mg, 0.20 mmol) was added at 273 K. After stirring the solution for 2 h at 273 K, an excess amount of diethyl ether (60 mL) was added in a single step and the solution was kept for 1 day at ambient temperature. The solution was separated by decantation and the resulting white precipitates of **I** were evacuated at ambient temperature. The analytically pure **I** was obtained as a white powder. Yield 0.27 g (69%).  $^1\text{H}$  NMR (270.0 MHz,  $\text{DMSO-}d_6$ , 298 K, TMS)  $\delta = 5.37$  ppm ( $\Delta\nu_{1/2} = 1.6$  Hz);  $^{183}\text{W}$  NMR (11.20 MHz,  $\text{DMSO-}d_6$ , 298 K,  $\text{Na}_2\text{WO}_4$ )  $\delta = -97.8$  ( $\Delta\nu_{1/2} = 4.8$  Hz),  $-114.7$  ( $\Delta\nu_{1/2} = 3.2$  Hz), and  $-168.3$  ppm ( $\Delta\nu_{1/2} = 5.0$  Hz) with an integrated intensity ratio of 2:2:1, respectively, indicating the fast proton-exchange between the two bridging oxygens (i.e., O20/O22 and O25/O27); UV-Vis ( $\text{CH}_3\text{CN}$ )  $\lambda_{\text{max}}$  ( $\epsilon$ ) 268 nm ( $19500 \text{ mol}^{-1}\text{dm}^3\text{cm}^{-1}$ ); IR (KBr), 949, 891, 860, 806, 736, 540, 466, 443, 354, 292  $\text{cm}^{-1}$ ; positive ion MS (CSI, acetone),  $m/z$  2214 ( $[\text{TBA}_8\text{H}_2\text{GeW}_{10}\text{O}_{36}]^{2+}$ ) and 4186 ( $[\text{TBA}_7\text{H}_2\text{GeW}_{10}\text{O}_{36}]^+$ ); elemental analysis calcd (%) for  $\text{C}_{96}\text{H}_{218}\text{N}_6\text{O}_{36}\text{GeW}_{10}$  ( $[(n\text{-C}_4\text{H}_9)_4\text{N}]_6[\gamma\text{-H}_2\text{GeW}_{10}\text{O}_{36}]$ ), C 29.24, H 5.57, N 2.13, Ge 1.84, W 46.61; found, C 28.61, H 5.84, N 2.25, Ge 1.77, W 46.10.

**Synthesis and Characterization of  $[(\text{CH}_3)_4\text{N}]_4[\gamma\text{-GeW}_{10}\text{O}_{34}(\text{H}_2\text{O})_2]\cdot 8\text{H}_2\text{O}$ .** The pH value of the aqueous solution (8 mL) containing  $\text{K}_8[\gamma\text{-GeW}_{10}\text{O}_{36}]\cdot 6\text{H}_2\text{O}$  (2.77 g, 0.8 mmol) was carefully adjusted to 1.9 with  $\text{HNO}_3$ , followed by addition of the aqueous solution (0.5 mL) containing  $[(\text{CH}_3)_4\text{N}]\text{Cl}$  (1.08 g, 10 mmol). After stirring the solution for 3 min at room temperature, the resulting white precipitates

were collected by filtration, washed with water, and evacuated at ambient temperature. The analytically pure  $[(\text{CH}_3)_4\text{N}]_4[\gamma\text{-GeW}_{10}\text{O}_{34}(\text{H}_2\text{O})_2]$  was obtained as a white powder. Yield 0.63 g (24 %). An aqueous solution (1 mL) containing  $[(\text{CH}_3)_4\text{N}]_4[\gamma\text{-GeW}_{10}\text{O}_{34}(\text{H}_2\text{O})_2]$  (51.6 mg, 18  $\mu\text{mol}$ ) was kept at 277 K and single crystals suitable for X-ray structure analysis were obtained. IR (KBr), 1484, 1449, 1417, 1384, 1288, 1211, 1154, 957, 859, 809, 787, 744, 696, 653, 593, 546, 493, 480, 460, 435, 396, 354, 325  $\text{cm}^{-1}$ ; elemental analysis calcd (%) for  $\text{C}_{16}\text{H}_{68}\text{N}_4\text{O}_{44}\text{GeW}_{10}$  ( $[(\text{CH}_3)_4\text{N}]_4[\gamma\text{-GeW}_{10}\text{O}_{34}(\text{H}_2\text{O})_2]\cdot 8\text{H}_2\text{O}$ ), Ge 2.48, W 62.71, C 6.56, H 2.34, N 1.91; found, Ge 2.45, W 63.74, C 6.74, H 2.09, N 1.79.

**A Typical Procedure for Catalytic Knoevenagel Condensation.** Catalytic reactions were carried out with a glass tube (30 mL) containing a magnetic stir bar. A typical procedure for the catalytic reaction was as follows: active methylene compound (1.0 mmol), aldehyde (1.5 mmol), acetonitrile (1 mL), and internal standard (naphthalene, ca. 0.3 mmol) were charged in the reaction vessel. The reaction was initiated by the addition of **I** (10  $\mu\text{mol}$ ) and the reaction solution was periodically analyzed by GC, GC-MS and NMR. All products were known compounds and identified by comparison of their  $^1\text{H}$  and  $^{13}\text{C}$  NMR signals with the literature data.

#### Data of products

**Ethyl (2E)-2-cyano-3-phenyl-2-propenoate (3a).**  $^1\text{H}$  NMR (270 MHz,  $\text{CDCl}_3$ , 298 K, TMS):  $\delta$  = 8.26 (s, 1H), 8.02–7.98 (m, 2H), 7.60–7.47 (m, 3H), 4.39 (q,  $J$  = 7.11 Hz, 2H), 1.40 (t,  $J$  = 7.16 Hz, 3H);  $^{13}\text{C}\{^1\text{H}\}$  NMR (67.5 MHz,  $\text{CDCl}_3$ , 298 K, TMS):  $\delta$  = 162.4, 155.0, 133.2, 131.4, 131.0, 129.2, 115.4, 103.0, 62.7, 14.1; MS (70 eV, EI):  $m/z$  (%): 202 (13), 201 (94) [ $M^+$ ], 200 (67), 173 (59), 172 (82), 157 (14), 156 (100), 146 (11), 129 (41), 128 (87), 127 (18), 107 (11), 102 (55), 101 (33), 78 (10), 77 (54), 76 (13), 75 (15), 51 (36), 50 (13).

**2-Benzylidenemalononitrile (3b).**  $^1\text{H}$  NMR (270 MHz,  $\text{CDCl}_3$ , 298 K, TMS):  $\delta$  = 7.94–7.89 (m, 2H), 7.79 (s, 1H), 7.68–7.51 (m, 3H);  $^{13}\text{C}\{^1\text{H}\}$  NMR (67.5 MHz,  $\text{CDCl}_3$ , 298 K, TMS):  $\delta$  = 159.9, 134.6, 130.9, 130.7, 129.6, 113.7, 112.5, 82.8; MS (70 eV, EI):  $m/z$  (%): 155 (12), 154 (100) [ $M^+$ ], 153 (10), 128 (11), 127 (82), 103 (50), 100 (12), 76 (15), 51 (14), 50 (13).

**Ethyl (2E)-2-cyano-3-(4-methylphenyl)-2-propenoate (3d).**  $^1\text{H}$  NMR (270 MHz,  $\text{CDCl}_3$ , 298 K, TMS):  $\delta$  = 8.21 (s, 1H), 7.92–7.89 (m, 2H), 7.32–7.27 (m, 2H), 4.38 (q,  $J$  = 7.11 Hz, 2H), 2.44 (s, 3H), 1.40 (t,  $J$  = 7.16 Hz, 3H);  $^{13}\text{C}\{^1\text{H}\}$  NMR (67.5 MHz,  $\text{CDCl}_3$ , 298 K, TMS):  $\delta$  = 162.7, 154.9, 144.6, 131.2, 130.0, 128.8, 115.7, 101.5, 62.5, 21.8, 14.1; MS (70 eV, EI):  $m/z$  (%): 216 (15), 215 (100) [ $M^+$ ], 214 (26), 200 (26), 187 (36), 186 (23), 172 (39), 170 (69), 169 (10), 143 (27), 142 (41), 141 (20), 140 (23), 116 (35), 115 (77), 114 (10), 91 (14), 89 (14), 65 (20), 63 (10).

**Ethyl (2E)-3-(4-chlorophenyl)-2-cyano-2-propenoate (3e).**  $^1\text{H}$  NMR (270 MHz,  $\text{CDCl}_3$ , 298 K, TMS):  $\delta$  = 8.20 (s, 1H), 7.95–7.92 (m, 2H), 7.50–7.27 (m, 2H), 4.39 (q,  $J$  = 7.11 Hz, 2H), 1.40 (t,  $J$  = 7.16 Hz, 3H);  $^{13}\text{C}\{^1\text{H}\}$  NMR (67.5 MHz,  $\text{CDCl}_3$ , 298 K, TMS):  $\delta$  = 162.2, 153.4, 139.6, 132.2, 129.8, 129.6, 115.2, 103.5, 62.8, 14.1; MS (70 eV, EI):  $m/z$  (%): 237 (34), 236 (25), 235 (100) [ $M^+$ ], 234 (37), 209 (22), 208 (15), 207 (65), 206 (23), 200 (27), 192 (27), 191 (12), 190 (80), 182 (10), 180 (12), 172

(29), 165 (10), 164 (21), 163 (35), 162 (56), 161 (17), 141 (15), 138 (11), 136 (34), 128 (24), 127 (61), 126 (48), 111 (14), 101 (13), 100 (22), 99 (21), 76 (15), 75 (47), 74 (13), 51 (15), 50 (19).

**Ethyl (2E)-2-cyano-2-heptenoate (3f).**  $^1\text{H}$  NMR (270 MHz,  $\text{CDCl}_3$ , 298 K, TMS):  $\delta$  = 7.66 (t,  $J$  = 7.83 Hz, 1H), 4.32 (q,  $J$  = 7.11 Hz, 2H), 2.57 (m, 2H), 1.61–1.50 (m, 2H), 1.47–1.33 (m, 5H), 0.95 (t,  $J$  = 7.16 Hz, 3H);  $^{13}\text{C}\{^1\text{H}\}$  NMR (67.5 MHz,  $\text{CDCl}_3$ , 298 K, TMS):  $\delta$  = 163.8, 161.3, 113.6, 109.7, 62.3, 31.6, 29.7, 22.3, 14.0, 13.6; MS (70 eV, EI):  $m/z$  (%): 181 (1)[ $M^+$ ], 136 (16), 126 (48), 124 (14), 111 (16), 108 (10), 107 (13), 98 (100), 83 (28), 81 (14), 80 (22), 68 (11), 67 (11), 56 (68), 55 (16), 52 (13).

**Ethyl 2-cyano-5-phenyl-2,4-pentadienoate (3g).**  $^1\text{H}$  NMR (270 MHz,  $\text{CDCl}_3$ , 298 K, TMS):  $\delta$  = 8.02–8.00 (m, 1H), 7.61–7.57 (m, 2H), 7.44–7.41 (m, 3H), 7.30–7.26 (m, 2H), 4.34 (q,  $J$  = 7.11 Hz, 2H), 1.38 (t,  $J$  = 7.16 Hz);  $^{13}\text{C}\{^1\text{H}\}$  NMR (67.5 MHz,  $\text{CDCl}_3$ , 298 K, TMS):  $\delta$  = 162.3, 155.4, 148.8, 134.6, 131.1, 129.1, 128.5, 123.0, 114.5, 104.5, 62.3, 14.1; MS (70 eV, EI):  $m/z$  (%): 202 (30)[ $M^+$ ], 173 (36), 159 (11), 158 (100), 157 (68), 156 (12), 130 (28), 129 (40), 128 (18), 103 (26), 102 (28), 79 (17), 78 (17), 76 (25), 75 (25), 51 (29), 50 (16).

**Ethyl (2E)-2-cyano-3-(3-pyridinyl)-2-propenoate (3h).**  $^1\text{H}$  NMR (270 MHz,  $\text{CDCl}_3$ , 298 K, TMS):  $\delta$  = 8.93–8.92 (m, 1H), 8.78–8.75 (m, H), 8.61–8.56 (m, H), 8.27 (s, H), 7.51–7.46 (m, 1H), 4.42 (q,  $J$  = 7.11 Hz, 2H), 1.42 (t,  $J$  = 7.16 Hz, 3H);  $^{13}\text{C}\{^1\text{H}\}$  NMR (67.5 MHz,  $\text{CDCl}_3$ , 298 K, TMS):  $\delta$  = 161.7, 153.4, 152.9, 151.2, 135.9, 127.5, 124.0, 114.8, 105.6, 63.0, 14.1; MS (70 eV, EI):  $m/z$  (%): 202 (30) [ $M^+$ ], 159 (11), 158 (100), 157 (68), 156 (12), 130 (28), 129 (40), 128 (18), 103 (26), 102 (28), 79 (17), 78 (17), 76 (25), 75 (25), 51 (29), 50 (16).

**Ethyl cyano(cyclopentylidene)acetate (3i).**  $^1\text{H}$  NMR (270 MHz,  $\text{CDCl}_3$ , 298 K, TMS):  $\delta$  = 4.27 (q,  $J$  = 7.11 Hz, 2H), 2.99 (t,  $J$  = 6.62 Hz, 2H), 2.80 (t,  $J$  = 6.48 Hz, 2H), 1.88–1.78 (m, 4H), 1.34 (t,  $J$  = 7.16 Hz, 3H);  $^{13}\text{C}\{^1\text{H}\}$  NMR (67.5 MHz,  $\text{CDCl}_3$ , 298 K, TMS):  $\delta$  = 187.4, 161.9, 115.6, 100.8, 61.5, 37.7, 35.4, 26.5, 22.3, 14.1; MS (70 eV, EI):  $m/z$  (%): 179 (15) [ $M^+$ ], 151 (40), 134 (25), 133 (16), 123 (100), 122 (17), 106 (20), 105 (18), 104 (13), 95 (13), 80 (10), 79 (24), 78 (15), 77 (22), 67 (23), 51 (11).

**Ethyl cyano(cyclohexylidene)acetate (3j).**  $^1\text{H}$  NMR (270 MHz,  $\text{CDCl}_3$ , 298 K, TMS):  $\delta$  = 4.27 (q,  $J$  = 7.20 Hz, 2H), 2.98 (t,  $J$  = 6.08 Hz, 2H), 2.66 (t,  $J$  = 6.21 Hz, 2H), 1.85–1.61 (m, 6H), 1.35 (t,  $J$  = 7.16 Hz, 3H);  $^{13}\text{C}\{^1\text{H}\}$  NMR (67.5 MHz,  $\text{CDCl}_3$ , 298 K, TMS):  $\delta$  = 179.9, 161.9, 115.5, 102.0, 61.6, 36.8, 31.5, 28.5, 28.2, 25.6, 14.0; MS (70 eV, EI):  $m/z$  (%): 193 (36)[ $M^+$ ], 165 (60), 148 (54), 147 (57), 146 (19), 138 (11), 137 (100), 136 (16), 122 (16), 121 (79), 120 (43), 119 (42), 118 (20), 111 (16), 109 (35), 106 (17), 104 (13), 94 (14), 93 (47), 91 (31), 81 (26), 80 (30), 79 (27), 78 (17), 77 (22), 68 (13), 67 (21), 66 (15), 65 (24), 64 (11), 55 (26), 53 (15), 52 (14), 51 (14).

**(2-Amino-3-cyano-4H-chromene-4-yl)malononitrile.**  $^1\text{H}$  NMR (270 MHz,  $\text{DMSO}-d_6$ , 298 K, TMS):  $\delta$  = 7.54–7.37 (m, 4H), 7.29 (dd,  $J$  = 7.43 Hz, 1H), 7.15 (d,  $J$  = 8.10 Hz, 1H), 5.09 (d,  $J$  = 3.78 Hz, 1H), 4.61 (d,  $J$  = 3.78 Hz, 1H);  $^{13}\text{C}\{^1\text{H}\}$  NMR (67.5 MHz,  $\text{DMSO}-d_6$ , 298 K, TMS):  $\delta$  = 163.5, 149.8, 130.2, 128.9, 125.1, 119.4, 118.0, 116.4, 113.1, 112.9, 48.9, 37.1, 32.4.

**Table S1.** Crystallographic Data for  $[(\text{CH}_3)_4\text{N}]_4[\gamma\text{-GeW}_{10}\text{O}_{34}(\text{H}_2\text{O})_2]\cdot 8\text{H}_2\text{O}$  and  $\text{TBA}_6\cdot\mathbf{I}$

|                                          | $[(\text{CH}_3)_4\text{N}]_4[\gamma\text{-GeW}_{10}\text{O}_{34}(\text{H}_2\text{O})_2]\cdot 8\text{H}_2\text{O}$ | $\text{TBA}_6\cdot\mathbf{I}$                          |
|------------------------------------------|-------------------------------------------------------------------------------------------------------------------|--------------------------------------------------------|
| formula                                  | $\text{C}_{16}\text{GeN}_4\text{O}_{44}\text{W}_{10}$                                                             | $\text{C}_{102}\text{GeN}_9\text{O}_{36}\text{W}_{10}$ |
| fw                                       | 2863.27                                                                                                           | 3838.20                                                |
| crystal system                           | Monoclinic                                                                                                        | Orthorhombic                                           |
| space group                              | $P2_1/n(\#14)$                                                                                                    | $Pbca(\#61)$                                           |
| $a$ (Å)                                  | 11.62520(10)                                                                                                      | 17.74710(10)                                           |
| $b$ (Å)                                  | 22.3313(2)                                                                                                        | 31.6276(2)                                             |
| $c$ (Å)                                  | 21.6699(2)                                                                                                        | 48.1971(3)                                             |
| $\beta$ (deg)                            | 91.85                                                                                                             | 90.00                                                  |
| $V$ (Å <sup>3</sup> )                    | 5622.71(9)                                                                                                        | 27052.9(3)                                             |
| $Z$                                      | 4                                                                                                                 | 8                                                      |
| gof                                      | 1.539                                                                                                             | 1.271                                                  |
| $D_{\text{calcd}}$ (g cm <sup>-3</sup> ) | 3.322                                                                                                             | 1.885                                                  |
| $R$ [ $I > 2\sigma(I)$ ]                 | 0.0493 (for 14389 data)                                                                                           | 0.0866 (for 33132 data)                                |
| $R_w$ (all data)                         | 0.1829                                                                                                            | 0.2543                                                 |

**Table S2.** Effect of Catalysts on Knoevenagel Condensation of **1a** with **2a**<sup>a</sup>

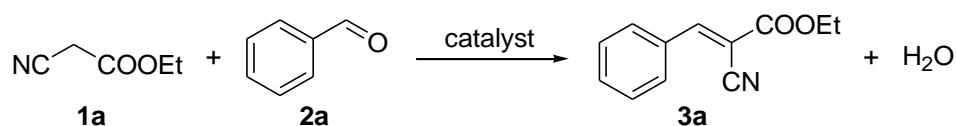

| Entry          | Catalyst                                                                                | Yield (%) |
|----------------|-----------------------------------------------------------------------------------------|-----------|
| 1              | TBA <sub>6</sub> ·I                                                                     | 98 (95)   |
| 2 <sup>b</sup> | TBA <sub>6</sub> ·I                                                                     | 91        |
| 3              | TBA <sub>4</sub> [γ-GeW <sub>10</sub> O <sub>34</sub> (H <sub>2</sub> O) <sub>2</sub> ] | 35        |
| 4              | K <sub>8</sub> [γ-GeW <sub>10</sub> O <sub>36</sub> ]·6H <sub>2</sub> O                 | 4         |
| 5              | TBA <sub>4</sub> [γ-SiW <sub>10</sub> O <sub>34</sub> (H <sub>2</sub> O) <sub>2</sub> ] | 18        |
| 6              | TBA <sub>4</sub> [α-SiW <sub>12</sub> O <sub>40</sub> ]                                 | 1         |
| 7              | Na <sub>2</sub> WO <sub>4</sub> ·2H <sub>2</sub> O                                      | 2         |
| 8 <sup>c</sup> | GeO <sub>2</sub>                                                                        | <1        |
| 9 <sup>d</sup> | TBABr                                                                                   | 2         |
| 10             | TBA <sub>8</sub> H <sub>2</sub> [(γ-SiYW <sub>10</sub> O <sub>36</sub> ) <sub>2</sub> ] | 12        |
| 11             | without                                                                                 | <1        |

<sup>a</sup> Reaction conditions: Catalyst (W: 10 mol% with respect to **1a**), **1a** (1.0 mmol), **2a** (1.5 mmol), CH<sub>3</sub>CN (1 mL), 305 K, 2 h. Yield (%) = **3a** (mol)/initial **1a** (mol) × 100. The value in the parenthesis was isolated yield. <sup>b</sup> **2a** (1.0 mmol), 4 h. <sup>c</sup> GeO<sub>2</sub> (1 mol% with respect to **1a**). <sup>d</sup> TBABr (6 mol% with respect to **1a**).



|                 |                                                                    |             |                  |        |      |       |     |          |     |
|-----------------|--------------------------------------------------------------------|-------------|------------------|--------|------|-------|-----|----------|-----|
| 18              | aminopropylsilyl-tethered MCM-41                                   | 9.5/9.9/1   | toluene          | rt     | 60   | (99)  | 9   | 9        | S25 |
| 19              | aminopropyl-functionalized MCM                                     | 67/67/1     | cyclohexane      | 355    | 2160 | 94    | 63  | 2        | S26 |
| 20 <sup>i</sup> | polystyryl supported-TBD                                           | 10/10/1     | –                | 303    | 60   | 93    | 9   | 9        | S27 |
| 21              | Pd <sub>nano</sub> /hydrotalcite                                   | 1/1/–       | toluene          | 353    | 60   | 99    | –   | –        | S28 |
| 22 <sup>j</sup> | [diamine-A]BF <sub>4</sub>                                         | 5/5/1       | –                | rt     | 1    | 100   | 5   | 300      | S29 |
| 23              | Ru(C <sub>2</sub> H <sub>4</sub> )(PPh <sub>3</sub> ) <sub>3</sub> | 50/50/1     | benzene          | rt     | 1020 | 98    | 49  | 3        | S30 |
| 24 <sup>k</sup> | (HDTMA <sup>+</sup> )-[Si]-MCM-41                                  | 2.6/2.5/–   | benzene          | 293    | 360  | 97    | –   | –        | S31 |
| 25              | nano-silica dendrimer                                              | 10/10/1     | <i>n</i> -hexane | rt     | 360  | 90    | 9   | 2        | S32 |
| 26              | layered Ni-Zn mixed basic salt                                     | 1.5/1/–     | water            | 323    | 360  | 91    | –   | –        | S33 |
| 27              | urea                                                               | 10/10/1     | –                | 373    | 60   | 96    | 10  | 10       | S34 |
| 28              | triphenylphosphane/microwave irradiation                           | 6.5/5/1     | –                |        | 3    | 90    | 5   | 90       | S35 |
| 29              | [bmim]OH                                                           | 5/5/1       | –                | rt     | 12   | (93)  | 5   | 23       | S36 |
| 30              | polystyrene-supported poly(amidoamine) dendrimer                   | 200/200/1   | ethanol          | 323    | 15   | (99)  | 198 | 792      | S37 |
| 31              | sulfonated nitrocoal acid                                          | 50/50/1     | benzene          | reflux | 600  | 91    | 46  | 5        | S38 |
| 32              | LDH-F                                                              | 1/1/–       | DMF              | 333    | 120  | 92    | –   | –        | S39 |
| 33              | organic-inorganic hybrid silica material                           | 83/92/1     | –                | 403    | 120  | (100) | 83  | 42       | S40 |
| 34 <sup>l</sup> | [C <sub>4</sub> dabco]BF <sub>4</sub>                              | 6.7/6.7/1   | water            | 373    | 40   | (96)  | 6   | 10       | S41 |
| 35 <sup>m</sup> | PAN <sub>p</sub> F-3                                               | 7/7/1       | ethanol          | reflux | 90   | (97)  | 7   | 5        | S42 |
| 36              | RuH <sub>2</sub> (PPh <sub>3</sub> ) <sub>4</sub>                  | 33/37/1     | THF              | rt     | 1440 | (91)  | 30  | 1        | S43 |
| 37              | RuHAP                                                              | 20/24/1     | water            | rt     | 240  | >99   | 20  | 5        | S44 |
| 38              | functionalized (PS(N <sub>3</sub> ))-PEG                           | 100/100/1   | water            | 293    | 1440 | 97    | 97  | 4        | S45 |
| 39              | IRMOF-3 <sub>DEF</sub>                                             | 35/40/1     | DMSO             | 313    | 120  | 99    | 35  | 17 (174) | S46 |
| 40              | CaCl <sub>2</sub> /Et <sub>3</sub> N                               | 10/10/0.5/1 | ethanol          | rt     | 30   | 90    | 9   | 18       | S47 |
| 41              | NaOH                                                               | 10/10/1     | ethanol          | rt     | 30   | 90    | 9   | 18       | S47 |
| 42              | L-proline/microwave irradiation                                    | 2/1.7/1     | –                |        | 5    | 100   | 2   | 24       | S48 |



|                 |                                                    |                            |                    |        |      |      |              |             |     |
|-----------------|----------------------------------------------------|----------------------------|--------------------|--------|------|------|--------------|-------------|-----|
| 43              | imidazole                                          | 4/4/1                      | DCE                | reflux | 40   | (97) | 4            | 6           | S49 |
| 44 <sup>n</sup> | DBU                                                | 5/5/1                      | water              | rt     | 120  | (93) | 5            | 2           | S50 |
| 45              | DBU acetate                                        | 5/5/1                      | water              | rt     | 120  | (95) | 5            | 2           | S50 |
| 46              | diethylamine-modified PEG-600                      | 10/10/1                    | –                  | rt     | 6    | (93) | 9            | 93          | S51 |
| 47              | silicon oxynitride                                 | 1/1/1                      | toluene            | 323    | 1200 | 100  | 1            | <1          | S52 |
| 48 <sup>o</sup> | FDU-ED                                             | 28/28/1                    | ethanol            | 353    | 60   | 99   | 28           | 28          | S53 |
| 49              | diamino-functionalized MCM-41                      | 1/1/–                      | toluene            | 323    | 15   | 100  | –            | –           | S54 |
| 50              | NbCl <sub>5</sub>                                  | 12/10/1                    | CH <sub>3</sub> CN | reflux | 150  | (90) | 9            | 4           | S55 |
| 51              | CoFe <sub>2</sub> O <sub>4</sub>                   | 20/20/1                    | water/ethanol      | 323    | 20   | (93) | 19           | 56          | S56 |
| 52              | KF                                                 | 4/4/1                      | ethanol            | 298    | 60   | 100  | 4            | 4           | S57 |
| 53              | reconstructed hydrotalcite                         | 17/17/–                    | water              | 333    | 600  | 94   | –            | –           | S58 |
|                 |                                                    |                            |                    |        |      | (90) |              |             |     |
| 54 <sup>p</sup> | VAp                                                | 41667/45833/1<br>767/843/1 | water              | 303    | 300  | (95) | 39583<br>728 | 7917<br>146 | S59 |
| 55              | aminopropyl-functionalized SBA-15                  | 55/55/1                    | cyclohexane        | 355    | 60   | >99  | 55           | 55          | S60 |
|                 |                                                    | 9/9/1                      | toluene            | rt     | 60   | (99) | 9            | 9           | S61 |
| 56              | aminopropyl-functionalized MCM-41                  | 10/10/1                    | toluene            | rt     | 60   | (99) | 9            | 9           | S61 |
| 57              | aminopropyl-functionalized SBA-1                   | 9/9/1                      | toluene            | rt     | 360  | (96) | 8            | 1           | S61 |
| 58 <sup>q</sup> | AP-IL-SBA-15                                       | 74/74/1                    | water              | 323    | 60   | 94   | 70           | 70          | S62 |
| 59 <sup>r</sup> | NAP                                                | 10/10/1                    | water              | rt     | 120  | (91) | 9            | 5           | S63 |
| 60              | 3-hydroxyethylammonium- <i>n</i> -propanesulfonate | 10/10/1                    | water              | rt     | 15   | (95) | 10           | 38          | S64 |
| 61              | LaHAP                                              | 50/75/1                    | toluene            | 333    | 1440 | >99  | 50           | 2           | S65 |
| 62 <sup>s</sup> | DMAN/SiO <sub>2</sub>                              | 10000/11400/1              | ethanol            | 333    | 360  | 100  | 10000        | 1667        | S66 |
|                 |                                                    |                            |                    |        |      |      |              | (7680)      |     |
| 63 <sup>t</sup> | NPm                                                | 1/1/–                      | methanol           | rt     | 60   | (96) | –            | –           | S67 |
| 64              | 2-hydroxyethylammonium formate                     | 1/1/–                      | –                  | rt     | 180  | (91) | –            | –           | S68 |

|                 |                                                           |           |                       |        |     |      |    |     |     |
|-----------------|-----------------------------------------------------------|-----------|-----------------------|--------|-----|------|----|-----|-----|
| 65              | ammonium acetate/microwave irradiation                    | 1/1/1     | –                     |        | 5   | (97) | 1  | 12  | S69 |
| 66              | NaNO <sub>3</sub> /fluorapatite                           | 2/2/6/1   | –                     | rt     | 15  | (94) | 2  | 7   | S70 |
| 67              | Al <sub>2</sub> O <sub>3</sub> -OK                        | 12/10/–   | ethanol               | reflux | 30  | (98) | –  | –   | S71 |
| 68              | proline                                                   | 20/10/1   | DMSO                  | rt     | 960 | (94) | 9  | <1  | S72 |
| 69              | NaF or LiCl/microwave irradiation                         | 1/1/1     | –                     |        | 1.5 | 94   | 1  | 38  | S73 |
| 70              | K <sub>2</sub> O-Al <sub>2</sub> O <sub>3</sub>           | 1.05/1/–  | –                     | 296    | 90  | (94) | –  | –   | S74 |
| 71              | <i>N</i> -methylpiperazine                                | 5/5/1     | –                     | rt     | 45  | 92   | 5  | 6   | S75 |
| 72              | MgO                                                       | 0.3/0.3/1 | CH <sub>3</sub> CN    | reflux | 10  | 90   | <1 | 2   | S76 |
| 73 <sup>u</sup> | IL-OPPh <sub>2</sub>                                      | 12/10/1   | –                     | 333    | 23  | (90) | 9  | 23  | S77 |
| 74              | CoHAP                                                     | 1/1/–     | –                     | 353    | 5   | 96   | –  | –   | S78 |
| 75              | morpholine                                                | 22/20/1   | water                 | rt     | 120 | 90   | 18 | 9   | S79 |
| 76 <sup>v</sup> | EDDA                                                      | 5/5/1     | [bmim]BF <sub>4</sub> | rt     | 10  | (95) | 5  | 29  | S80 |
| 77              | piperidine/microwave irradiation                          | 50/50/1   | –                     |        | 3   | (96) | 48 | 960 | S81 |
| 78              | Mg-Al-O- <i>t</i> -Bu hydroxalcite                        | 1/1/–     | DMF                   | rt     | 20  | (98) | –  | –   | S82 |
| 79 <sup>w</sup> | NaNO <sub>3</sub> /NP                                     | 1/1/–     | methanol              | rt     | 60  | (94) | –  | –   | S83 |
| 80              | hydroxalcite                                              | 1/1/–     | [bmim]PF <sub>6</sub> | rt     | 30  | (94) | –  | –   | S84 |
| 81              | ionic liquid functionalized silicagel                     | 1/1/–     | –                     | 373    | 300 | 95   | –  | –   | S85 |
| 82              | KF-Al <sub>2</sub> O <sub>3</sub> /ultrasound irradiation | 6/5/–     | –                     | 313    | 120 | (99) | –  | –   | S86 |

<sup>a</sup> **1a/2a/C** = molar ratio of **1a/2a**/catalyst. The yield values in the parentheses were the isolated yields. TOF (h<sup>-1</sup>) = TON/reaction time (h). The TOF values in the parentheses were determined by the initial rates. <sup>b</sup> LDH-DA = layered double hydroxides-supported diisopropylamide. <sup>c</sup> [bmim]Br = 1-butyl-3-methylimidazolium bromide. <sup>d</sup> BTEAC = benzyltriethylammonium chloride. <sup>e</sup> ASCPEI = silica grafted polyethylenimine. <sup>f</sup> TEA = triethylamine. <sup>g</sup> PE-MCM-41 = pore-expanded MCM-41. <sup>h</sup> [2-aemim]PF<sub>6</sub> = 1-aminoethyl-3-methylimidazolium hexafluorophosphate. <sup>i</sup> TBD = 1,5,7-triazabicyclo[4.4.0]dec-5-ene. <sup>j</sup> diamine-A = dipiperidinomethane. <sup>k</sup> HDTMA<sup>+</sup> = hexadecyltrimethylammonium. <sup>l</sup> [C<sub>4</sub>dabco]BF<sub>4</sub> = 1-butyl-4-aza-1-azoniabicyclo[2.2.2]-octane tetrafluoroborate. <sup>m</sup> PAN<sub>p</sub>F-3 = tertiary-amine functionalized polyacrylonitrile fiber. <sup>n</sup> DBU = 1,8-diazabicyclo[5.4.0]-undec-7-ene. <sup>o</sup> ED = ethylene diamine. <sup>p</sup> VAp = calcium vanadate apatite. <sup>q</sup> AP-IL-SBA-15 = ionic liquid immobilized on SBA-15. <sup>r</sup> NAP = 3-aminopropylated silicagel. <sup>s</sup> DMAN/SiO<sub>2</sub> = 1,8-bis(dimethylamino)naphthalene functionalized SiO<sub>2</sub>. <sup>t</sup> NPm = natural microphosphate. <sup>u</sup> IL-OPPh<sub>2</sub> = imidazolium-based phosphinite ionic liquid. <sup>v</sup> EDDA = ethylenediammonium diacetate. <sup>w</sup> NP = natural phosphate.

**Table S4.** Various Catalytic Systems for Knoevenagel Condensation of **1c** with **2a**<sup>a</sup>

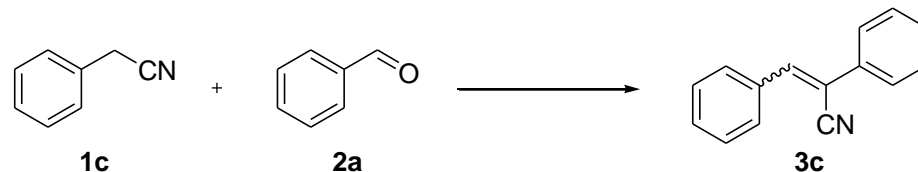

| Entry          | Catalyst                                                                   | <b>1c/2a/C</b> | Solvent                          | Temp. (K)  | Time (min) | Yield (%) | TON       | TOF (h <sup>-1</sup> ) | Ref.             |
|----------------|----------------------------------------------------------------------------|----------------|----------------------------------|------------|------------|-----------|-----------|------------------------|------------------|
| <b>1</b>       | <i>TBA</i> <sub>6</sub> <b>I</b>                                           | <b>20/30/1</b> | <i>CH</i> <sub>3</sub> <i>CN</i> | <b>353</b> | <b>120</b> | <b>96</b> | <b>18</b> | <b>9</b>               | <b>This work</b> |
| 2              | NaOCH <sub>3</sub>                                                         | 10/10/1        | ethanol                          | rt         | 60         | 95        | 10        | 10                     | S87              |
| 3              | NaOH/TBABr                                                                 | 10/10/1/1      | toluene                          | 303        | 20         | 97        | 10        | 29                     | S88              |
| 4              | K <sub>2</sub> CO <sub>3</sub> /18-crown-6                                 | 10/10/1/1      | toluene                          | 303        | 90         | 80        | 8         | 5                      | S88              |
| 5              | hydrotalcite                                                               | 1/1.5/-        | toluene                          | 453        | 420        | 98        | -         | -                      | S28              |
| 6              | poly- <i>N</i> -isopropyl acrylamide                                       | 20/20/1        | 10% NaOHaq                       | rt         | 120        | 86        | 15        | 8                      | S89              |
| 7              | reconstructed hydrotalcite                                                 | 3/6/-          | water/DMF                        | 353        | 60         | 98        | -         | -                      | S58              |
| 8 <sup>b</sup> | VAp                                                                        | 1.5/1/0.05 g   | water                            | 383        | 720        | 89        | 20        | 2                      | S59              |
| 9              | KF/Al <sub>2</sub> O <sub>3</sub> /microwave irradiation                   | 2/2/-          | neat                             | -          | 4          | 90        | -         | -                      | S90              |
| 10             | <i>p</i> -(trimethylammoniomethyl)calyx[ <i>n</i> ]arene methyl ether/NaOH | 100/200/1/375  | 5N NaOHaq                        | rt         | 120        | 91        | <0.1      | <0.1                   | S91              |
| 11             | P(MeNCH <sub>2</sub> CH <sub>2</sub> ) <sub>3</sub> N                      | 33/33/1        | neat                             | 323        | 360        | 98        | 33        | 5                      | S92              |
| 12             | cetyltrimethylammonium chloride/NaOH                                       | 10/10/1/1.25   | 0.025 M NaOHaq                   | rt         | 60         | 86        | 0.7       | 0.7                    | S93              |
| 13             | RuH <sub>2</sub> (PPh <sub>3</sub> ) <sub>4</sub> /dppe                    | 33/37/1/2      | THF                              | 333        | overnight  | 87        | 29        | <5                     | S94              |
| 14             | K <sub>2</sub> CO <sub>3</sub>                                             | -/-/1          | -                                | -          | -          | 95        | 1         | -                      | S95              |
| 15             | NaOH/PEG                                                                   | 20/20/20/1     | toluene                          | 293        | 60         | 71        | 0.7       | 0.7                    | S96              |

<sup>a</sup> **1c/2a/C** = molar ratio of **1c/2a/catalyst**. The yield values in parentheses were isolated yields. TOF (h<sup>-1</sup>) = TON/reaction time (h). <sup>b</sup> VAp = calcium vanadate apatite.

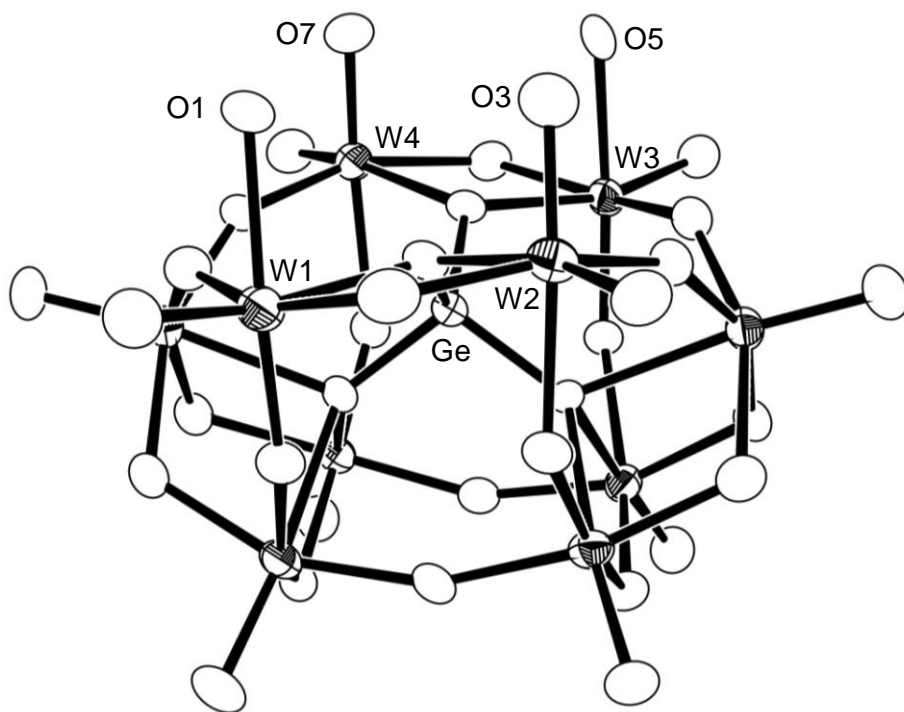

**Fig. S1** Molecular structure of the anion part of  $[(\text{CH}_3)_4\text{N}]_4[\gamma\text{-GeW}_{10}\text{O}_{34}(\text{H}_2\text{O})_2]$ . Thermal ellipsoids set at 50% probability.

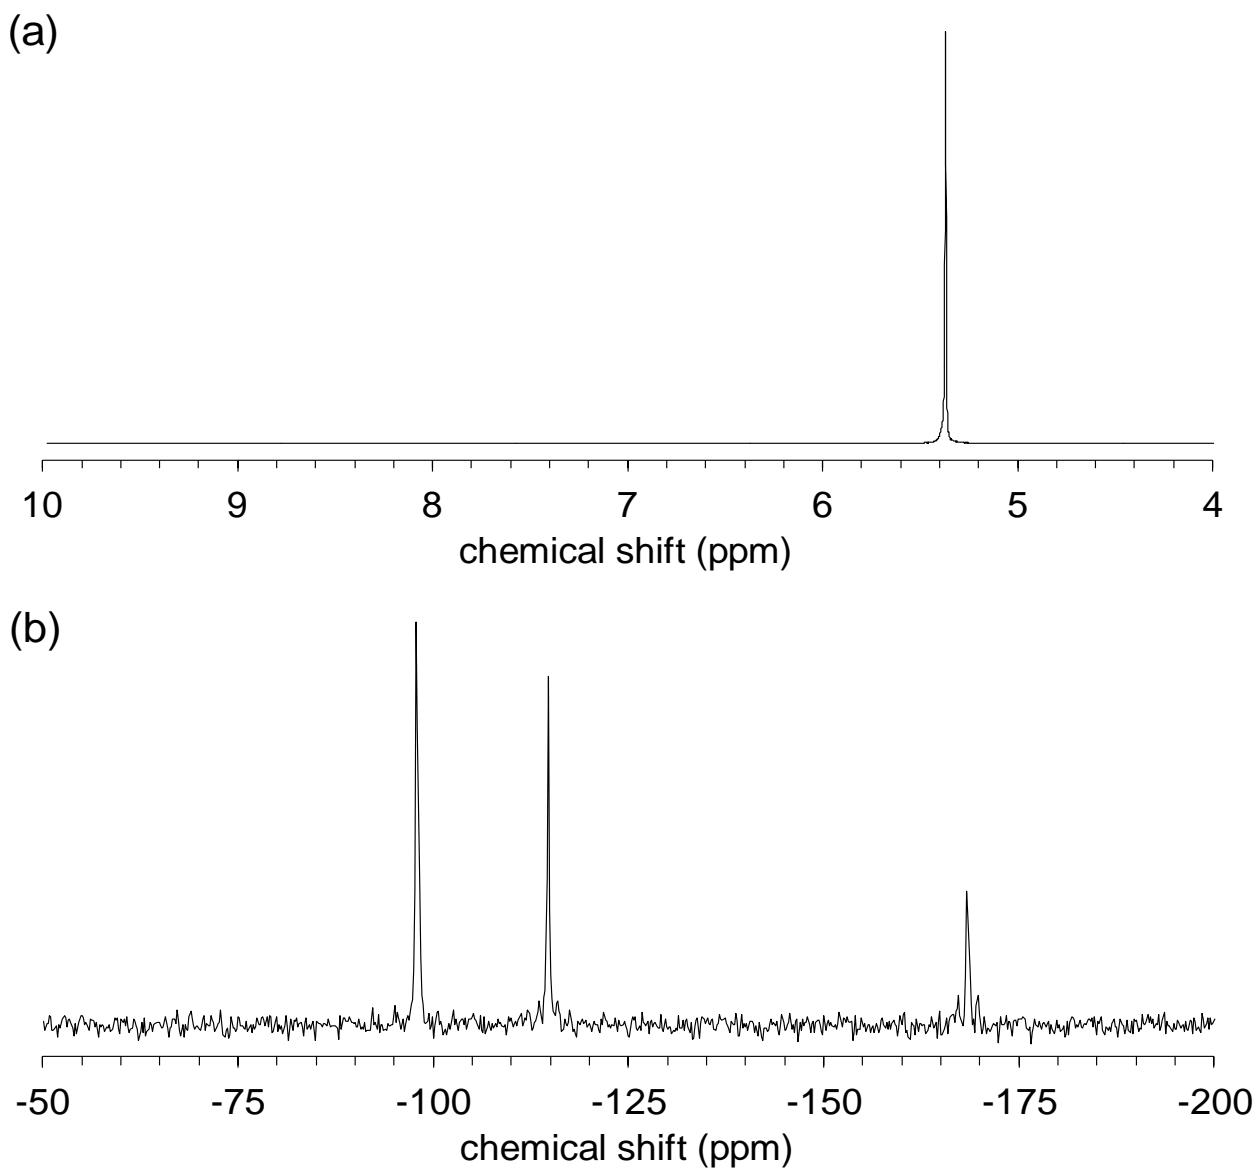

**Fig. S2.** (a)  $^1\text{H}$  and (b)  $^{183}\text{W}$  NMR spectra of  $\text{TBA}_6\cdot\text{I}$  (Solvent:  $\text{DMSO-}d_6$ , 298 K).

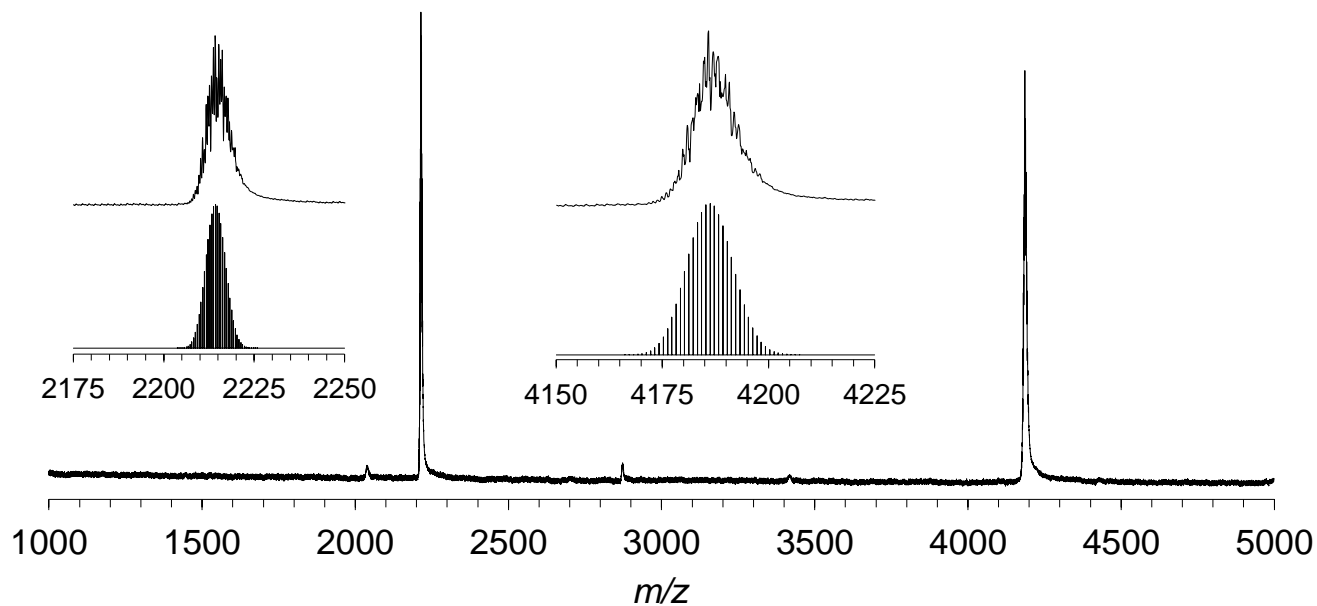

**Fig. S3.** CSI-MS spectrum ( $m/z = 1000\text{--}5000$ ) of  $\text{TBA}_6\cdot\text{I}$  (Solvent: acetone). Inset: CSI-MS spectra ( $m/z = 2175\text{--}2250$  and  $4150\text{--}4225$ ) of  $\text{TBA}_6\cdot\text{I}$  and calculated patterns of  $\text{TBA}_8\text{H}_2\text{GeW}_{10}\text{O}_{36}^{2+}$  ( $m/z = 2214$ ) and  $\text{TBA}_7\text{H}_2\text{GeW}_{10}\text{O}_{36}^+$  ( $m/z = 4186$ ).

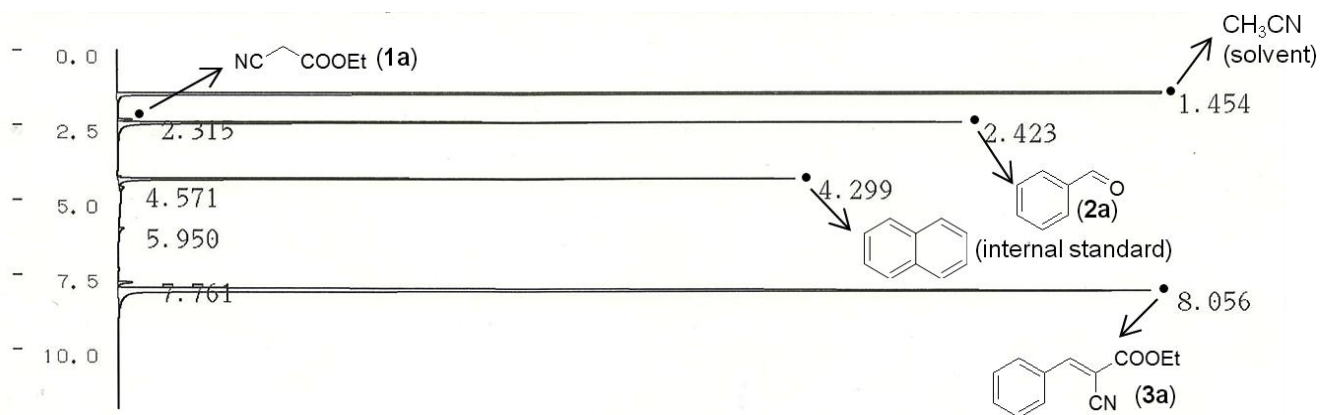

**Fig. S4.** GC chart of the reaction of **1a** with **2a**. The reaction was carried out under the same conditions as those of entry 1 in Table 1.

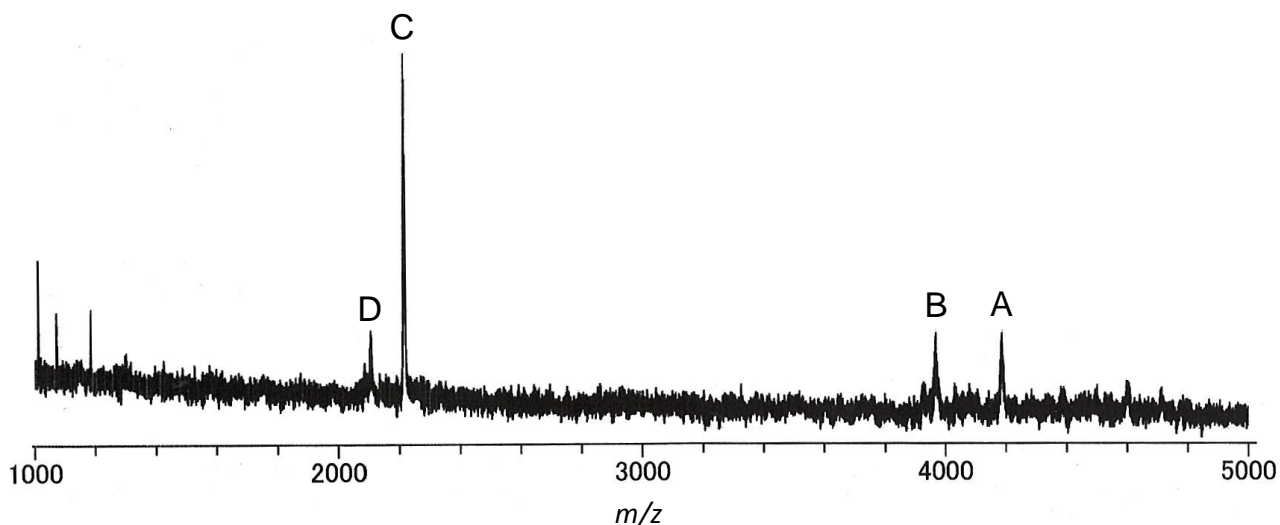

**Fig. S5.** CSI-MS spectrum ( $m/z = 1000\text{--}5000$ ) of **I** after the reaction of **1a** with **2a** (Solvent:  $\text{CH}_3\text{CN}$ ). The reaction was carried out under the same conditions as those of entry 1 in Table 1. The peaks A, B, C, and D are assignable to  $[\text{TBA}_7\text{H}_2\text{GeW}_{10}\text{O}_{36}]^+$ ,  $[\text{TBA}_6\text{HGeW}_{10}\text{O}_{35}(\text{CH}_3\text{CN})]^+$ ,  $[\text{TBA}_8\text{H}_2\text{GeW}_{10}\text{O}_{36}]^{2+}$ , and  $[\text{TBA}_7\text{HGeW}_{10}\text{O}_{35}(\text{CH}_3\text{CN})]^{2+}$ , respectively.



## References

- S1 A. B. Pangborn, M. A. Giardello, R. H. Grubbs, R. K. Rosen and F. J. Timmers, *Organometallics*, 1996, **15**, 1518–1520.
- S2 D. D. Perrin and W. L. F. Armarego, *Purification of Laboratory Chemicals*, 3rd ed., Pergamon Press, Oxford, U.K., 1988.
- S3 (a) K. Kamata, K. Yonehara, Y. Sumida, K. Yamaguchi, S. Hikichi and N. Mizuno, *Science*, 2003, **300**, 964; (b) N. H. Nsouli, B. S. Bassil, M. H. Dickman, U. Kortz, B. Keita and L. Nadjjo, *Inorg. Chem.*, 2006, **45**, 3858.
- S4 (a) *CrystalClear 1.4.5 SP2*; Rigaku and Rigaku/MS: The Woodlands, TX, 1999. (b) J. W. Pflugrath, *Acta Crystallogr.*, 1999, **D55**, 1718.
- S5 Otwinski, Z.; Minor, W. Processing of X-ray Diffraction Data Collected in Oscillation Mode. In *Methods of Enzymology*; ed. C. W. Carter, Jr. and R. M. Sweet, Macromolecular Crystallography, Part A; Academic Press: New York, 1997; Vol. 276, pp 307–326.
- S6 CrystalStructure 3.8, Rigaku and Rigaku/MS, The Woodlands, TX, 2000.
- S7 L. J. Farrugia, *J. Appl. Crystallogr.*, 1999, **32**, 837.
- S8 G. M. Sheldrick, *SHELX97, Programs for Crystal Structure Analysis*, Release 97-2, University of Göttingen, Göttingen, Germany, 1997.
- S9 M. L. Kantam, A. Ravindra, C. V. Reddy, B. Sreedhar and B. M. Choudary, *Adv. Synth. Catal.*, 2006, **348**, 569.
- S10 N. Sharma, U. K. Sharma, R. Kumar, N. Katoch, R. Kumar and A. K. Sinha, *Adv. Synth. Catal.*, 2011, **353**, 871.
- S11 S. Sebti, R. Tahir, R. Nazih, A. Saber and S. Boulaajaj, *Appl. Catal. A*, 2002, **228**, 155.
- S12 S. Saravanamurugan, M. Palanichamy, M. Hartmann and V. Murugesan, *Appl. Catal. A*, 2006, **298**, 8.
- S13 S. M. Ribeiro, A. C. Serra and A. M. d'A. R. Gonsalves, *Appl. Catal. A*, 2011, **399**, 126.
- S14 M. Vijender, P. Kishire and B. Satyanarayana, *ARKIVOC*, 2008, (xiii), 122.
- S15 M. S. Abaee, M. M. Mojtahedi, M. M. Zahedi and G. Khanalizadeh, *ARKIVOC*, 2006, (xv), 48.
- S16 B. Siebenhaar, B. Casagrande, M. Studer and H.-U. Blaser, *Can. J. Chem.*, 2001, **79**, 566.
- S17 D. D. Das, P. J. E. Harlick and A. Sayari, *Catal. Commun.*, 2007, **8**, 829.
- S18 C. Yue, A. Mao, Y. Wei and M. Lü, *Catal. Commun.*, 2008, **9**, 1571.
- S19 B. Tamami and A. Fadavi, *Catal. Commun.*, 2005, **6**, 747.
- S20 X. Xin, X. Guo, H. Duan, Y. Lin and H. Sun, *Catal. Commun.*, 2007, **8**, 115.
- S21 W.-B. C. Cai, *Catal. Commun.*, 2008, **9**, 1291.
- S22 A. Kumar, M. Dewan, A. Saxena, A. De and S. Mozumdar, *Catal. Commun.*, 2010, **11**, 679.
- S23 Y. Wei, S. Zhang, Shuangfeng, C. Zhao, S. Luo and C.-T. Au, *Catal. Commun.*, 2011, **12**, 1333.
- S24 Y. Cai, Y. Peng and G. Song, *Catal. Lett.*, 2006, **109**, 61.
- S25 Y. Kubota, Y. Sugi and T. Tatsumi, *Catal. Surv. Asia*, 2007, **11**, 158.
- S26 D. J. Macquarrie and D. B. Jackson, *Chem. Commun.*, 1997, 1781.
- S27 F. Fringuelli, F. Pizzo, C. Vittoriani and L. Vaccaro, *Chem. Commun.*, 2004, 2756.
- S28 K. Motokura, N. Fujita, K. Mori, T. Mizugaki, K. Ebitani, K. Jitsukawa and K. Kaneda, *Chem. Eur. J.*, 2006, **12**, 8228.
- S29 M. Boronat, M. J. Climent, A. Corma, S. Iborra, R. Montón and M. J. Sabater, *Chem. Eur. J.*, 2010, **16**, 1221.
- S30 Y. Mizuho, N. Kasuga and S. Komiya, *Chem Lett.*, 1991, 2127.
- S31 Y. Kubota, Y. Nishizaki and Y. Sugi, *Chem. Lett.*, 2000, 998.
- S32 H. Hagiwara, M. Sekifuji, N. Tsubokawa, T. Hoshi and T. Suzuki, *Chem. Lett.*, 2009, **38**, 926.
- S33 T. Hara, J. Kurihara, N. Ichikuni and S. Shimazu, *Chem. Lett.*, 2010, **39**, 304.
- S34 Q. Sun, L.-X. Shi, Z.-M. Ge, T.-M. Cheng and R.-T. Li, *Chin. J. Chem.*, 2005, **23**, 745.
- S35 J. S. Yadav, B. V. S. Reddy, A. K. Basak, B. Visali, A.V. Narsaiah and K. Nagaiah, *Eur. J. Org.*

- Chem.*, 2004, 546.
- S36 B. C. Ranu and R. Jana, *Eur. J. Org. Chem.*, 2006, 3767.
- S37 G. R. Krishnan and K. Sreekumar, *Eur. J. Org. Chem.*, 2008, 4763.
- S38 C. K. S. Nair and M. Pardasaradhi, *Fuel*, 1995, **74**, 1531.
- S39 B. M. Choudary, M. L. Kantam, V. Neeraja, K. K. Rao, F. Figueras and L. Delmotte, *Green Chem.*, 2001, **3**, 257.
- S40 M. Trilla, R. Pleixats, M. W. C. Man and C. Bied, *Green Chem.*, 2009, **11**, 1815.
- S41 D.-Z. Xu, Y. Liu, S. Shi and Y. Wang, *Green Chem.*, 2010, **12**, 514.
- S42 G. Li, J. Xiao and W. Zhang, *Green Chem.*, 2011, **13**, 1828.
- S43 S. Murakami, T. Naota, H. Taki, M. Mizuno, H. Takaya, S. Komiyama, Y. Mizuho, N. Oyasato, M. Hiraoka, M. Hirano and A. Fukuoka, *J. Am. Chem. Soc.*, 1995, **117**, 12436.
- S44 K. Mori, T. Hara, T. Mizugaki, K. Ebitani and K. Kaneda, *J. Am. Chem. Soc.*, 2003, **125**, 11460.
- S45 V. Rodionov, H. Gao, S. Scroggins, D. A. Unruh, A.-J. Avestro and J. M. J. Fréchet, *J. Am. Chem. Soc.*, 2010, **132**, 2570.
- S46 J. Gascon, U. Aktay, M. D. Hernandez-Alonso, G. P. M. van Klink and F. Kapteijn, *J. Catal.*, 2009, **261**, 75.
- S47 M. Zhang, A.-Q. Zhang and Z.-H. Deng, *J. Chem. Res.*, 2005, 69.
- S48 H. A. Oskooie, E. Roomizadeh and M. M. Heravi, *J. Chem. Res.*, 2006, 246.
- S49 M. M. Heravi, M. H. Tehrani, K. Bakhtiari and H. A. Oslooie, *J. Chem. Res.*, 2006, 561.
- S50 A.-G. Ying, L.-M. Wang, L.-L. Wang, X.-Z. Chen and W.-D. Ye, *J. Chem. Res.*, 2010, 30.
- S51 W. Ye, H. Jiang and X.-C. Yang, *J. Chem. Sci.*, 2011, **123**, 331.
- S52 P. W. Lednor and R. de Ruiter, *J. Chem. Soc., Chem. Commun.*, 1991, 1625.
- S53 R. Xing, H. Wu, X. Li, Z. Zhao, Y. Liu, L. Chen and P. Wu, *J. Mater. Chem.*, 2009, **19**, 4004.
- S54 B. M. Choudary, M. L. Kantam, P. Srekanth, T. Bandyopadhyay, F. Figueras and A. Tuel, *J. Mol. Catal. A*, 1999, **142**, 361.
- S55 P. Leelavathi and S. R. Kumar, *J. Mol. Catal. A*, 2005, **240**, 99.
- S56 K. K. Senapati, C. Borgohain and P. Phukan, *J. Mol. Catal. A*, 2011, **339**, 24.
- S57 L. Rand, J. V. Swisher and C. J. Cronin, *J. Org. Chem.*, 1962, **27**, 3505.
- S58 K. Ebitani, K. Motokura, K. Mori, T. Mizugaki and K. Kaneda, *J. Org. Chem.*, 2006, **71**, 5440.
- S59 T. Hara, S. Kanai, K. Mori, T. Mizugaki, K. Ebitani, K. Jitsukawa and K. Kaneda, *J. Org. Chem.*, 2006, **71**, 7455.
- S60 (a) X. Wang, K. S. K. Lin, J. C. C. Chan and S. Cheng, *J. Phys. Chem. B*, 2005, **109**, 1763; (b) S. Cheng, X. Wang and S.-Y. Chen, *Top. Catal.*, 2009, **52**, 681.
- S61 Y. Kubota, Y. Nishizaki, H. Ikeya, M. Saeki, T. Hida, S. Kawazu, M. Yoshida, H. Fujita and Y. Sugi, *Micropor. Mesopor. Mater.*, 2004, **70**, 135.
- S62 H. Zhao, N. Yu, Y. Ding, R. Tan, C. Liu, D. Yin, H. Qiu and D. Yin, *Micropor. Mesopor. Mater.*, 2010, **136**, 10.
- S63 K. Isobe, T. Hoshi, T. Suzuki and H. Hagiwara, *Mol. Diversity*, 2005, **9**, 317.
- S64 D. Fang, Z.-H. Fei and Z.-L. Liu, *Monatsh. Chem.*, 2008, **139**, 799.
- S65 K. Mori, M. Oshiba, T. Hara, T. Mizugaki, K. Ebitani and K. Kaneda, *New J. Chem.*, 2006, **30**, 44.
- S66 E. Gianotti, U. Diaz, S. Coluccia and A. Corma, *Phys. Chem. Chem. Phys.*, 2011, **13**, 11702.
- S67 M. Zahouily, B. Bahlaouan, A. Solhy, M. Ouammou and S. Sebt, *React. Kinet. Catal. Lett.*, 2003, **78**, 129.
- S68 A. Ying, H. Liang, R. Zheng, C. Ge, H. Jiang and C. Wu, *Res. Chem. Intermed.*, 2011, **37**, 579.
- S69 A. K. Mitra, A. De and N. Karchaudhuri, *Synth. Commun.*, 1999, **29**, 2731.
- S70 S. Sbti, R. Nazih, R. Tahir and A. Saber, *Synth. Commun.*, 2001, **31**, 993.
- S71 T.-S. Jin, J.-J. Guo, H.-M. Liu and T.-S. Li, *Synth. Commun.*, 2003, **33**, 783.
- S72 G. Cardillo, S. Fabbroni, L. Gentilucci, M. Gianotti and A. Tolomelli, *Synth. Commun.*, 2003, **33**,

1587.

- S73 K. Mogilaiah, M. Prashanthi, G. R. Reddy, Ch. S. Reddy and N. V. Reddy, *Synth. Commun.*, 2003, **33**, 2309.
- S74 S.-X. Wang, J.-T. Li, W.-Z. Yang, Y.-H. Yin and Z.-H. Xie, *Synth. Commun.*, 2004, **34**, 829.
- S75 C. Mukhopadhyay and A. Datta, *Synth. Commun.*, 2008, **38**, 2103.
- S76 H. Sheibani, M. Seifi and A. Bazgir, *Synth. Commun.*, 2009, **39**, 1055.
- S77 H. Valizadeh and H. Gholipour, *Synth. Commun.*, 2010, **40**, 1477.
- S78 M. K. Pillai, S. Singh and S. B. Jonnalagadda, *Synth. Commun.*, 2010, **40**, 3710.
- S79 M. N. Gomes, C. M. A. de Oliveira, C. F. D. Garrote, V. de Oliveira and R. Menegatti, *Synth. Commun.*, 2011, **41**, 52.
- S80 Z. Zhou and Y. Sun, *Synth. Commun.*, 2011, **41**, 3162.
- S81 S. A.-E. Ayoubi, F. Texier-Boullet and J. Hamelin, *Synthesis*, 1994, **3**, 258.
- S82 B. M. Choudary, M. L. Kantam, B. Kavita, Ch. V. Reddy and F. Figueras, *Tetrahedron*, 2000, **56**, 9357.
- S83 S. Sebti, A. Smahi and A. Sohly, *Tetrahedron Lett.*, 2002, **43**, 1813.
- S84 F. A. Khan, J. Dash, R. Satapathy and S. K. Upadhyay, *Tetrahedron Lett.*, 2004, **45**, 3055.
- S85 G. Lai, J. Peng, J. Li, H. Qiu, J. Jiang, K. Jiang and Y. Shen, *Tetrahedron Lett.*, 2006, **47**, 6951.
- S86 S.-X. Wang, J.-T. Yang and T.-S. Li, *Ultrason. Sonochem.*, 2002, **9**, 159.
- S87 Y. Yue, H. Fang, M. Wang, Z. Wang and M. Yu, *J. Chem. Res.*, 2009, 377.
- S88 N. Taha, Y. Sasson and M. Chidambara, *Appl. Catal. A*, 2008, **30**, 217.
- S89 H. Hamamoto, M. Kudoh, H. Takahashi and S. Ikegami, *Org. Lett.*, 2006, **8**, 4015.
- S90 D. Villemin, A. Jullien and N. Bar, *Green Chem.*, 2003, **5**, 467.
- S91 S. Shimizu, S. Shirakawa, T. Suzuki and Y. Sakai, *Tetrahedron*, 2001, **57**, 6169.
- S92 B. A. D'Sa, P. Kisanga and J. G. Verkade, *J. Org. Chem.*, 1998, **63**, 3961.
- S93 F. Fringuelli, G. Pani, O. Piermatti and F. Pizzo, *Tetrahedron*, 1994, **50**, 11499.
- S94 T. Naota, H. Taki, M. Mizuno and S. Murahashi, *J. Am. Chem. Soc.*, 1989, **111**, 5954.
- S95 F. Ladhar and E. Gharbi, *Synth. Commun.*, 1991, **21**, 413.
- S96 B. Zupancic and M. Kokalj, *Synthesis*, 1981, 913.
